# Supplementary material for: Genomic analysis of Chlamydia psittaci from a multistate zoonotic outbreak in two chicken processing plants
Source: PubMed Central journal article supplement (PMC10475345; doi:10.7150/jgen.86558), 2023-08-19
Supplement: jgenv11p0040s1.pdf [file jgenv11p0040s1.pdf]

**Supplementary Figure 1:** Whole genome sequence alignment of genotype D reference (NJ1) and four outbreak isolates (GA1, VA1, VA2, VA3).

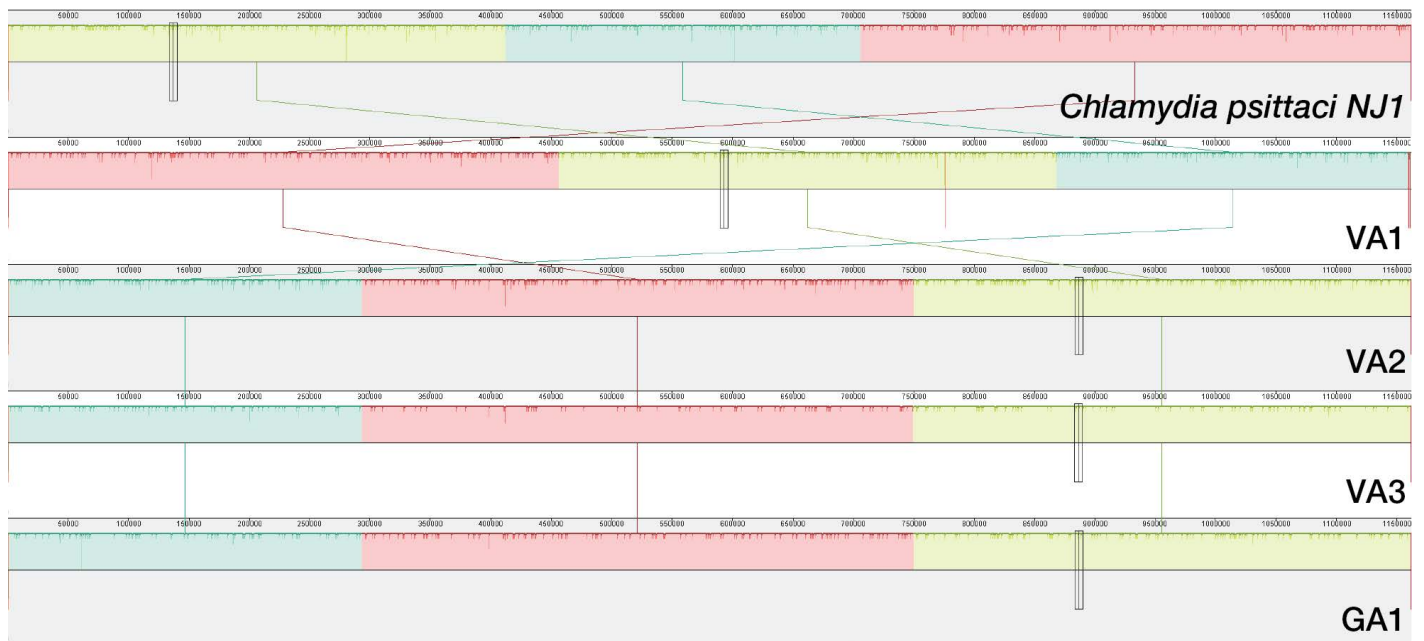

**Supplementary Table 1.** Detailed information on all single nucleotide polymorphisms (SNPs) identified between the four outbreak isolates and reference sequence NJ1.

| Reference Genome | Position | Reference Base | Alternative Base | Variant Quality | Variant Effect                    | Variant Impact | Gene ID      | Gene Symbol | Gene Product                            | GA1 | VA1 | VA2 | VA3 |
|------------------|----------|----------------|------------------|-----------------|-----------------------------------|----------------|--------------|-------------|-----------------------------------------|-----|-----|-----|-----|
| NC_018626.1      | 912100   | CTT            | CT               | 742             | frameshift variant                | High           | B712_RS03995 | .           | hypothetical protein                    | 1   | 1   | 1   | 1   |
| NC_018626.1      | 4273     | A              | G                | 742             | missense variant                  | Moderate       | B712_RS00020 | .           | transcript cleavage factor              | 1   | 1   | 1   | 1   |
| NC_018626.1      | 53469    | C              | A                | 742             | missense variant                  | Moderate       | B712_RS00225 | .           | protein arginine kinase                 | 1   | 1   | 1   | 1   |
| NC_018626.1      | 82817    | A              | C                | 742             | missense variant                  | Moderate       | B712_RS00360 | .           | RsmB/NOP family class I SAM-depende     | 1   | 1   | 1   | 1   |
| NC_018626.1      | 86108    | T              | C                | 739             | missense variant                  | Moderate       | B712_RS00385 | .           | hypothetical protein                    | 1   | 1   | 1   | 1   |
| NC_018626.1      | 159906   | G              | C                | 742             | missense variant                  | Moderate       | B712_RS00785 | .           | RMD1 family protein                     | 1   | 1   | 1   | 1   |
| NC_018626.1      | 203571   | C              | A                | 739             | missense variant                  | Moderate       | B712_RS00990 | .           | S41 family peptidase                    | 1   | 1   | 1   | 1   |
| NC_018626.1      | 239421   | C              | A                | 739             | missense variant                  | Moderate       | B712_RS01165 | .           | membrane protein                        | 1   | 1   | 1   | 1   |
| NC_018626.1      | 254992   | G              | T                | 742             | missense variant                  | Moderate       | B712_RS01250 | .           | VacB/RNase II family 3'-5' exoribonucle | 1   | 1   | 1   | 1   |
| NC_018626.1      | 267120   | A              | C                | 742             | missense variant                  | Moderate       | B712_RS01300 | .           | hypothetical protein                    | 1   | 1   | 1   | 1   |
| NC_018626.1      | 301930   | A              | C                | 742             | missense variant                  | Moderate       | B712_RS01415 | .           | autotransporter domain-containing prc   | 1   | 1   | 1   | 1   |
| NC_018626.1      | 313092   | A              | G                | 739             | missense variant                  | Moderate       | B712_RS01435 | .           | chemotaxis protein                      | 1   | 1   | 1   | 1   |
| NC_018626.1      | 353580   | T              | G                | 742             | missense variant                  | Moderate       | B712_RS01570 | .           | triose-phosphate isomerase              | 1   | 1   | 1   | 1   |
| NC_018626.1      | 417629   | G              | T                | 742             | missense variant                  | Moderate       | B712_RS01875 | .           | UDP-N-acetylmuramoyl-L-alanyl-D-glut    | 1   | 1   | 1   | 1   |
| NC_018626.1      | 467790   | A              | G                | 742             | missense variant                  | Moderate       | B712_RS02115 | .           | 4-hydroxy-3-methylbut-2-en-1-yl diphc   | 1   | 1   | 1   | 1   |
| NC_018626.1      | 480338   | G              | T                | 742             | missense variant                  | Moderate       | B712_RS02170 | lepA        | elongation factor 4                     | 1   | 1   | 1   | 1   |
| NC_018626.1      | 535108   | G              | T                | 742             | missense variant                  | Moderate       | B712_RS02400 | .           | hypothetical protein                    | 1   | 1   | 1   | 1   |
| NC_018626.1      | 561045   | A              | T                | 739             | missense variant                  | Moderate       | B712_RS02505 | .           | hypothetical protein                    | 1   | 1   | 1   | 1   |
| NC_018626.1      | 580345   | G              | C                | 739             | missense variant                  | Moderate       | B712_RS02585 | .           | 4-hydroxybenzoate octaprenyltransfer:   | 1   | 1   | 1   | 1   |
| NC_018626.1      | 636643   | C              | T                | 742             | missense variant                  | Moderate       | B712_RS02825 | .           | LifA/Efa1-related large cytotoxin       | 1   | 1   | 1   | 1   |
| NC_018626.1      | 639193   | A              | G                | 739             | missense variant                  | Moderate       | B712_RS02840 | .           | MAC/perforin family protein             | 1   | 1   | 1   | 1   |
| NC_018626.1      | 640838   | C              | A                | 742             | missense variant                  | Moderate       | B712_RS02840 | .           | MAC/perforin family protein             | 1   | 1   | 1   | 1   |
| NC_018626.1      | 685663   | G              | A                | 742             | missense variant                  | Moderate       | B712_RS03055 | .           | FAD-dependent monooxygenase             | 1   | 1   | 1   | 1   |
| NC_018626.1      | 715996   | A              | C                | 742             | missense variant                  | Moderate       | B712_RS03160 | .           | DUF1389 domain-containing protein       | 1   | 1   | 1   | 1   |
| NC_018626.1      | 759378   | T              | G                | 739             | missense variant                  | Moderate       | B712_RS03335 | .           | lauroyl acyltransferase                 | 1   | 1   | 1   | 1   |
| NC_018626.1      | 870418   | G              | T                | 742             | missense variant                  | Moderate       | B712_RS03830 | .           | translation initiation factor IF-3      | 1   | 1   | 1   | 1   |
| NC_018626.1      | 917044   | T              | G                | 739             | missense variant                  | Moderate       | B712_RS04010 | .           | autotransporter domain-containing prc   | 1   | 1   | 1   | 1   |
| NC_018626.1      | 935862   | C              | A                | 221             | missense variant                  | Moderate       | B712_RS04095 | pgsA        | CDP-diacylglycerol--glycerol-3-phospha  | 1   | 0   | 0   | 0   |
| NC_018626.1      | 995968   | A              | C                | 742             | missense variant                  | Moderate       | B712_RS04360 | mfd         | transcription-repair coupling factor    | 1   | 1   | 1   | 1   |
| NC_018626.1      | 1047391  | C              | T                | 742             | missense variant                  | Moderate       | B712_RS04580 | .           | phosphoenolpyruvate carboxykinase (C    | 1   | 1   | 1   | 1   |
| NC_018626.1      | 1120005  | C              | T                | 739             | missense variant                  | Moderate       | B712_RS04870 | .           | thio:disulfide interchange protein      | 1   | 1   | 1   | 1   |
| NC_018626.1      | 619462   | G              | C                | 739             | stop lost & splice region variant | High           | B712_RS02790 | .           | DUF648 domain-containing protein        | 1   | 1   | 1   | 1   |
| NC_018637.1      | 1382     | A              | T                | 742             | synonymous variant                | Low            | B712_RS05105 | .           | .                                       | 1   | 1   | 1   | 1   |
| NC_018626.1      | 3243     | T              | G                | 742             | synonymous variant                | Low            | B712_RS00020 | .           | transcript cleavage factor              | 1   | 1   | 1   | 1   |
| NC_018626.1      | 10727    | A              | G                | 742             | synonymous variant                | Low            | B712_RS00040 | recB        | exodeoxyribonuclease V subunit beta     | 1   | 1   | 1   | 1   |
| NC_018626.1      | 12348    | G              | A                | 739             | synonymous variant                | Low            | B712_RS00045 | .           | exodeoxyribonuclease V subunit gamrr    | 1   | 1   | 1   | 1   |
| NC_018626.1      | 17323    | C              | T                | 742             | synonymous variant                | Low            | B712_RS00060 | rpsD        | 30S ribosomal protein S4                | 1   | 1   | 1   | 1   |
| NC_018626.1      | 69413    | A              | G                | 739             | synonymous variant                | Low            | B712_RS00305 | .           | polysaccharide deacetylase family prot  | 1   | 1   | 1   | 1   |
| NC_018626.1      | 256849   | G              | A                | 742             | synonymous variant                | Low            | B712_RS01255 | dnaK        | molecular chaperone DnaK                | 1   | 1   | 1   | 1   |
| NC_018626.1      | 302390   | A              | C                | 742             | synonymous variant                | Low            | B712_RS01415 | .           | autotransporter domain-containing prc   | 1   | 1   | 1   | 1   |
| NC_018626.1      | 328645   | G              | T                | 742             | synonymous variant                | Low            | B712_RS01460 | .           | autotransporter domain-containing prc   | 1   | 1   | 1   | 1   |
| NC_018626.1      | 330136   | C              | G                | 739             | synonymous variant                | Low            | B712_RS01475 | gatA        | Asp-tRNA(Asn)/Glu-tRNA(Gln) amidotr     | 1   | 1   | 1   | 1   |
| NC_018626.1      | 409143   | G              | T                | 742             | synonymous variant                | Low            | B712_RS01825 | .           | Na(+)-transporting NADH-quinone red     | 1   | 1   | 1   | 1   |
| NC_018626.1      | 440582   | T              | C                | 742             | synonymous variant                | Low            | B712_RS01990 | .           | hypothetical protein                    | 1   | 1   | 1   | 1   |
| NC_018626.1      | 517751   | G              | A                | 742             | synonymous variant                | Low            | B712_RS02325 | infB        | translation initiation factor IF-2      | 1   | 1   | 1   | 1   |
| NC_018626.1      | 614046   | G              | C                | 742             | synonymous variant                | Low            | B712_RS02765 | .           | IncA family protein                     | 1   | 1   | 1   | 1   |
| NC_018626.1      | 651963   | T              | C                | 742             | synonymous variant                | Low            | B712_RS02890 | .           | tRNA-guanosine(34) transglycosylase     | 1   | 1   | 1   | 1   |
| NC_018626.1      | 683862   | G              | A                | 742             | synonymous variant                | Low            | B712_RS03045 | .           | leucine--tRNA ligase                    | 1   | 1   | 1   | 1   |
| NC_018626.1      | 1051082  | T              | G                | 742             | synonymous variant                | Low            | B712_RS04590 | .           | DEAD/DEAH box helicase                  | 1   | 1   | 1   | 1   |
| NC_018626.1      | 1052051  | G              | T                | 742             | synonymous variant                | Low            | B712_RS04590 | .           | DEAD/DEAH box helicase                  | 1   | 1   | 1   | 1   |
| NC_018626.1      | 1126032  | A              | G                | 739             | synonymous variant                | Low            | B712_RS04910 | .           | peroxiredoxin                           | 1   | 1   | 1   | 1   |
| NC_018626.1      | 1128456  | A              | C                | 739             | synonymous variant                | Low            | B712_RS04925 | .           | DUF1343 domain-containing protein       | 1   | 1   | 1   | 1   |
| NC_018626.1      | 201607   | G              | C                | 739             | upstream gene variant             | Modifier       | B712_RS00970 | .           | hypothetical protein                    | 1   | 1   | 1   | 1   |
| NC_018626.1      | 340900   | G              | A                | 739             | upstream gene variant             | Modifier       | B712_RS01500 | .           | ribonuclease HIII                       | 1   | 1   | 1   | 1   |
| NC_018626.1      | 344029   | A              | C                | 742             | upstream gene variant             | Modifier       | B712_RS01510 | .           | hypothetical protein                    | 1   | 1   | 1   | 1   |
| NC_018626.1      | 531538   | T              | C                | 739             | upstream gene variant             | Modifier       | B712_RS02370 | .           | hypothetical protein                    | 1   | 1   | 1   | 1   |
| NC_018626.1      | 601583   | C              | T                | 17.8704         | upstream gene variant             | Modifier       | B712_RS02710 | pgl         | 6-phosphogluconolactonase               | 1   | 1   | 1   | 0   |

|             |           |                |                           |          |                   |                                   |   |   |   |   |
|-------------|-----------|----------------|---------------------------|----------|-------------------|-----------------------------------|---|---|---|---|
| NC_018626.1 | 606083 C  | A              | 742 upstream gene variant | Modifier | B712_RS02715 .    | glucose-6-phosphate dehydrogenase | 1 | 1 | 1 | 1 |
| NC_018626.1 | 612267 TT | TTAT           | 140 upstream gene variant | Modifier | B712_RS02745 .    | hypothetical protein              | 1 | 1 | 1 | 1 |
| NC_018626.1 | 740285 G  | A              | 742 upstream gene variant | Modifier | B712_RS03240 rplS | 50S ribosomal protein L19         | 1 | 1 | 1 | 1 |
| NC_018626.1 | 973464 C  | T              | 739 upstream gene variant | Modifier | B712_RS04245 .    | hypothetical protein              | 1 | 1 | 1 | 1 |
| NC_018626.1 | 1013557 C | A              | 742 upstream gene variant | Modifier | B712_RS04430 .    | DNA translocase FtsK              | 1 | 1 | 1 | 1 |
| NC_018626.1 | 1072795 G | T              | 742 upstream gene variant | Modifier | B712_RS04665 .    | phage holin family protein        | 1 | 1 | 1 | 1 |
| NC_018626.1 | 277628 .  | I743068-746765 | inframe insertion         | Moderate | B712_RS01350 .    | membrane protein                  | 1 | 1 | 1 | 1 |
